# Supplementary material for: Synthesis and Smo Activity of Some Novel Benzamide Derivatives
Source: MDPI journal article supplement (doi:10.3390/molecules23010085), 2017-12-31
Supplement: s1 [file s1]

## Supporting Information

# Synthesis and Antiproliferative Activity of Novel Benzamide Derivatives

Huaiwei Ding<sup>1</sup>, Kai Chen<sup>1</sup>, Bingke Song<sup>1</sup>, Chenglong Deng<sup>1</sup>, Wei Li<sup>1</sup>, Li Niu<sup>1</sup>, Mengxuan Bai<sup>1</sup>, Hongrui Song<sup>1,\*</sup> and Lijuan Zhang<sup>1,\*</sup>

<sup>1</sup> Key Laboratory of Structure-Based Drug Design and Discovery, Ministry of Education, Shenyang Pharmaceutical University, Shenyang 110016, China; dinghuaiwei627@163.com (H.D.); kylechen0322@163.com (K.C.); s13050245586@163.com (B.S.); m15694145159@163.com (C.D.); 15757196069@163.com (W.L.); 18435154073@163.com (L.N.); baimengxuan\_2015@126.com (M.B.)

\* Correspondence: hongruisong0314@163.com (H.S.), yd\_zlj@163.com (L.Z.)

### Spectrum of intermediates and the target compounds

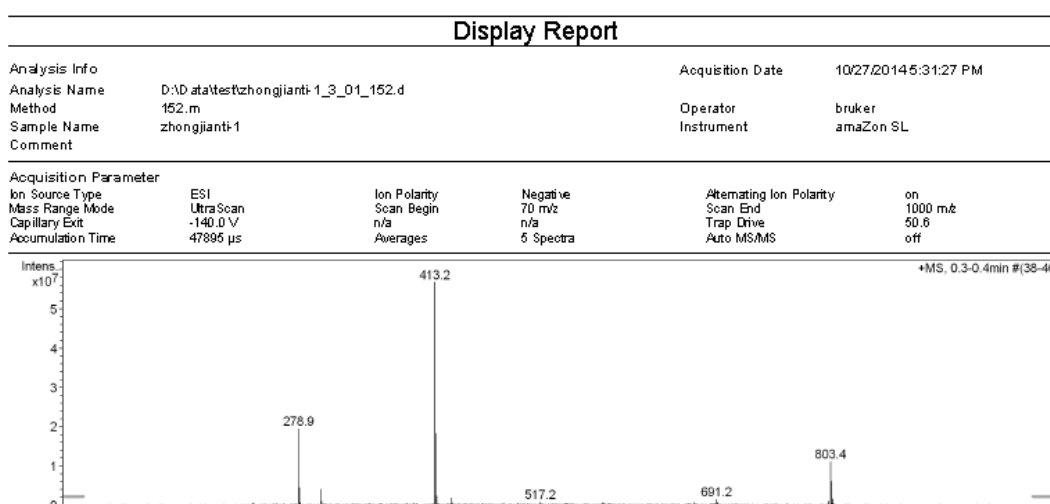

**Fig. 1-1** MS spectrum of compound 1

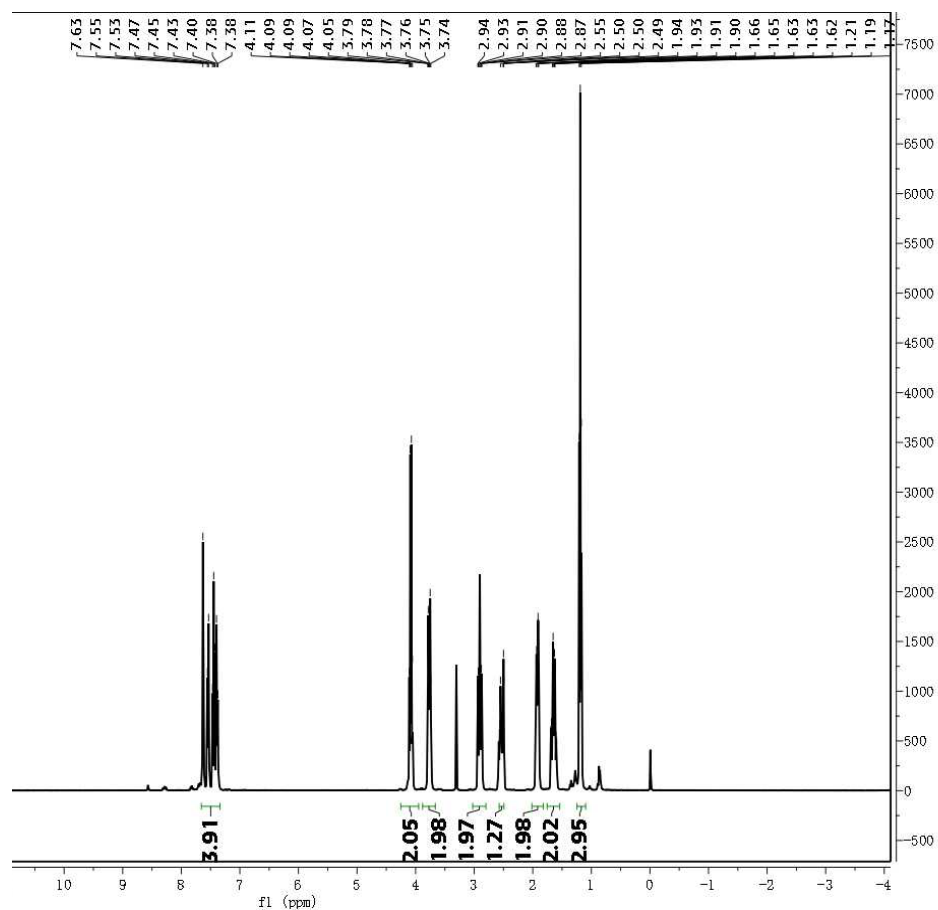

Fig. 1-2  $^1\text{H}$ -NMR spectrum of compound 1

### Display Report

#### Analysis Info

Analysis Name D:\Data\test\1103zhongjianti-2\_6\_01\_203.d  
Method 203.m  
Sample Name zhongjianti-2  
Comment

Acquisition Date 11/3/2014 1:51:10 PM

Operator bruker  
Instrument amaZon SL

#### Acquisition Parameter

|                   |                   |              |           |                          |          |
|-------------------|-------------------|--------------|-----------|--------------------------|----------|
| Ion Source Type   | ESI               | Ion Polarity | Positive  | Alternating Ion Polarity | on       |
| Mass Range Mode   | UltraScan         | Scan Begin   | 70 m/z    | Scan End                 | 1000 m/z |
| Capillary Exit    | 140.0 V           | n/a          | n/a       | Trap Drive               | 50.6     |
| Accumulation Time | 518 $\mu\text{s}$ | Averages     | 5 Spectra | Auto MS/MS               | off      |

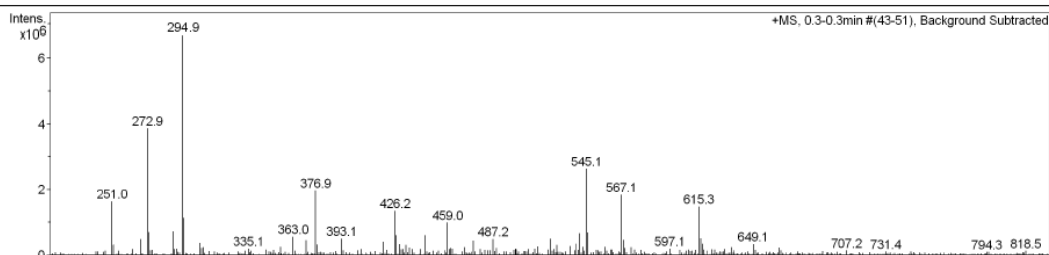

Fig. 2-1 MS spectrum of compound 2

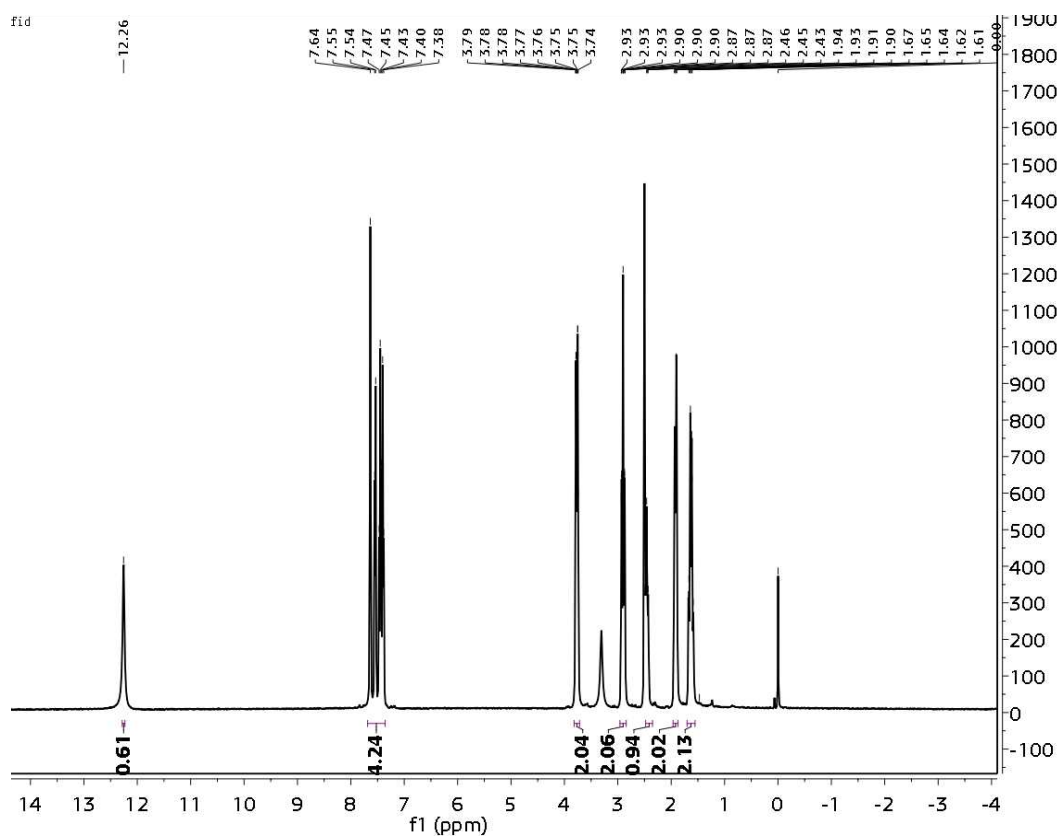

Fig. 2-2 <sup>1</sup>H-NMR spectrum of compound 2

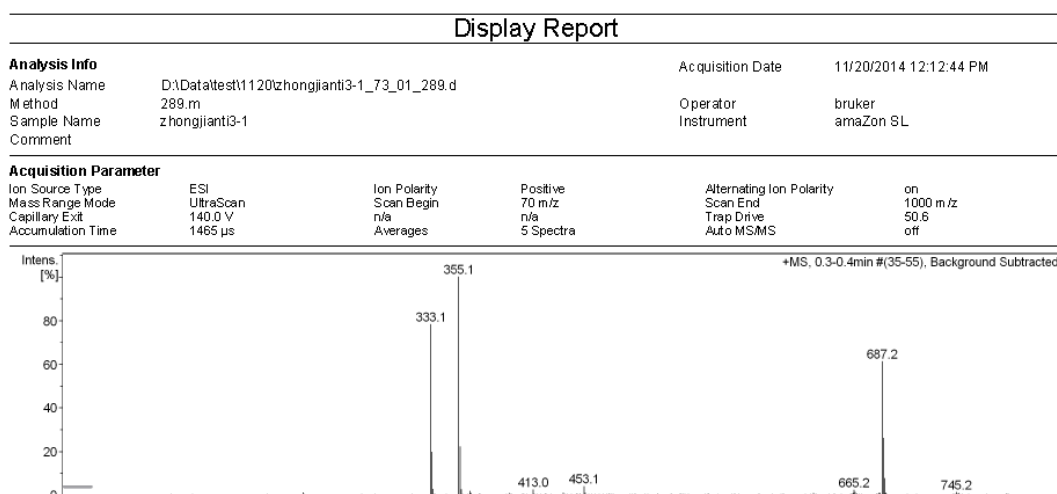

Fig. 3-1 MS spectrum of compound 3

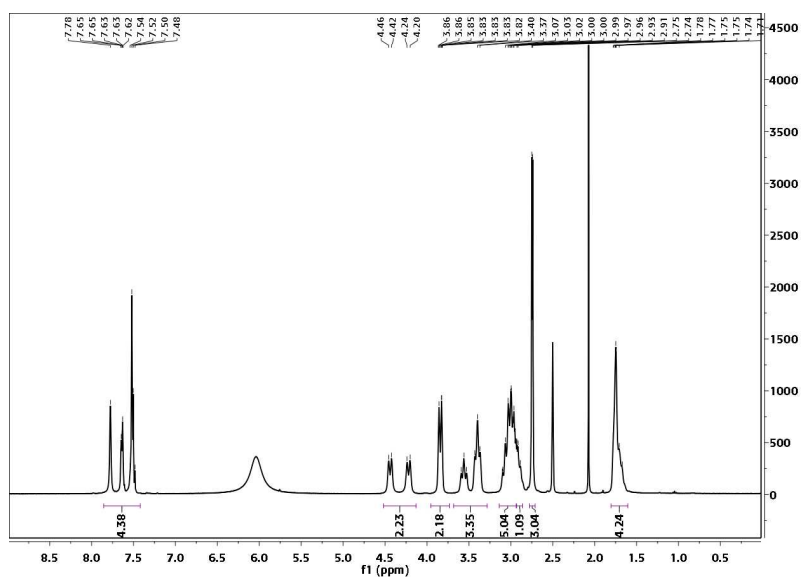

Fig. 3-2  $^1\text{H}$ -NMR spectrum of compound 3

## Direct Mass Spectrometry Analysis

Analysis Name: 17011178.d

Instrument: LC-MSD-Trip-SL

Print Date: 1/11/2017 7:18:21 PM

Sample Name: QK-1

Operator: Administrator

Acq. Date: 1/11/2017 7:16:52 PM

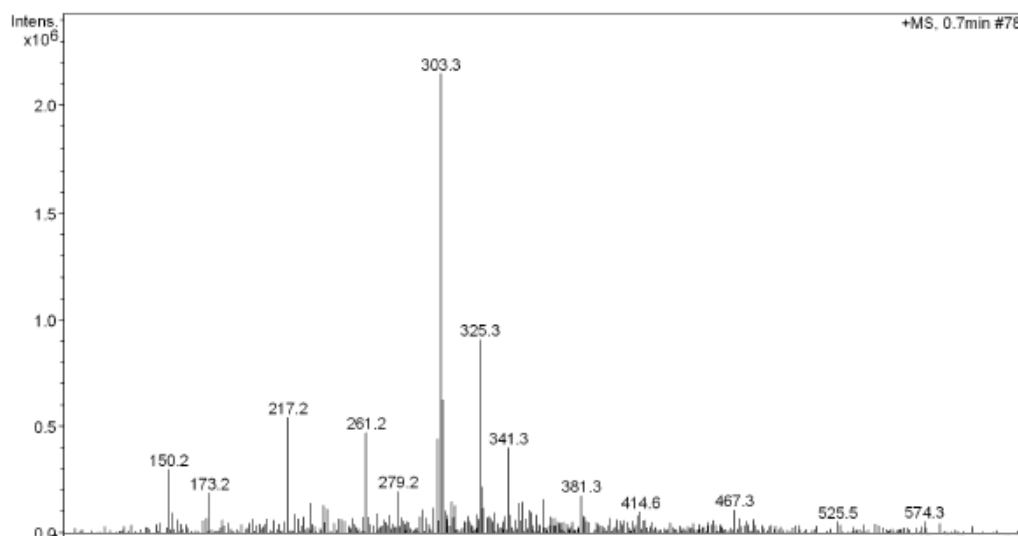

Fig. 4-1 MS spectrum of compound 4

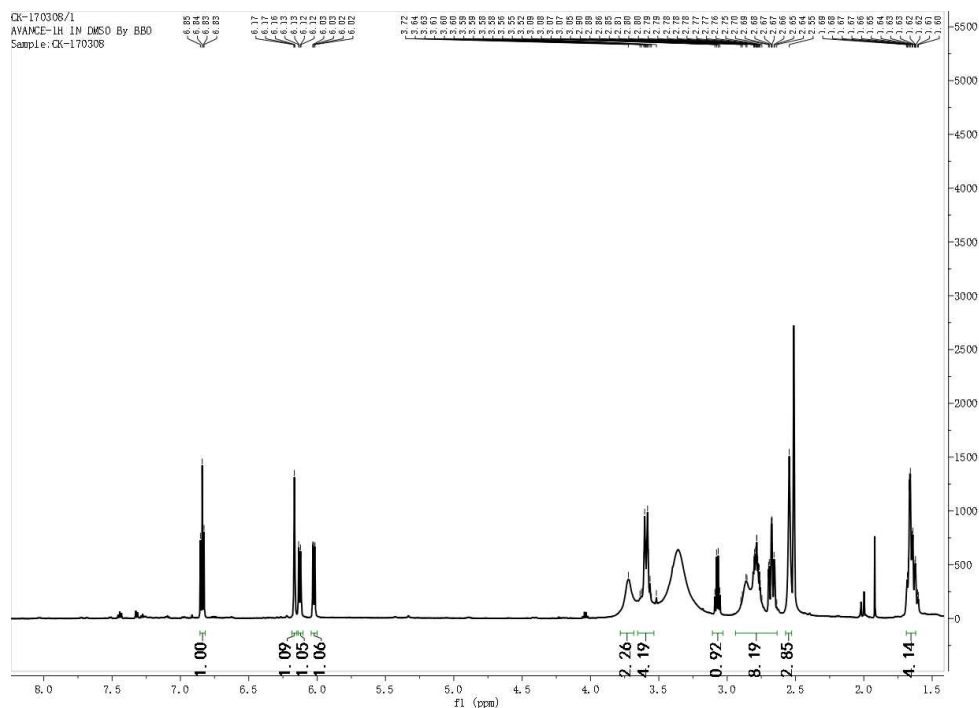

**Fig. 4-2**  $^1\text{H}$ -NMR spectrum of compound **4**

### Display Report

#### Analysis Info

Analysis Name D:\Data\test\0603\XA\_63\_01\_1503.d  
 Method 1503.m  
 Sample Name XA  
 Comment

Acquisition Date 6/3/2015 5:02:30 PM

Operator bruker  
 Instrument amaZon SL

#### Acquisition Parameter

|                   |                      |              |           |                          |          |
|-------------------|----------------------|--------------|-----------|--------------------------|----------|
| Ion Source Type   | ESI                  | Ion Polarity | Positive  | Alternating Ion Polarity | on       |
| Mass Range Mode   | UltraScan            | Scan Begin   | 70 m/z    | Scan End                 | 1000 m/z |
| Capillary Exit    | 140.0 V              | n/a          | n/a       | Trap Drive               | 50.6     |
| Accumulation Time | 200000 $\mu\text{s}$ | Averages     | 5 Spectra | Auto MS/MS               | off      |

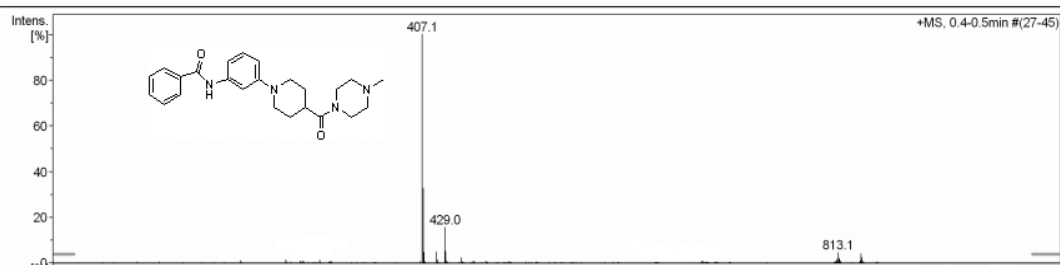

**Fig. 5-1** MS spectrum of compound **5a**

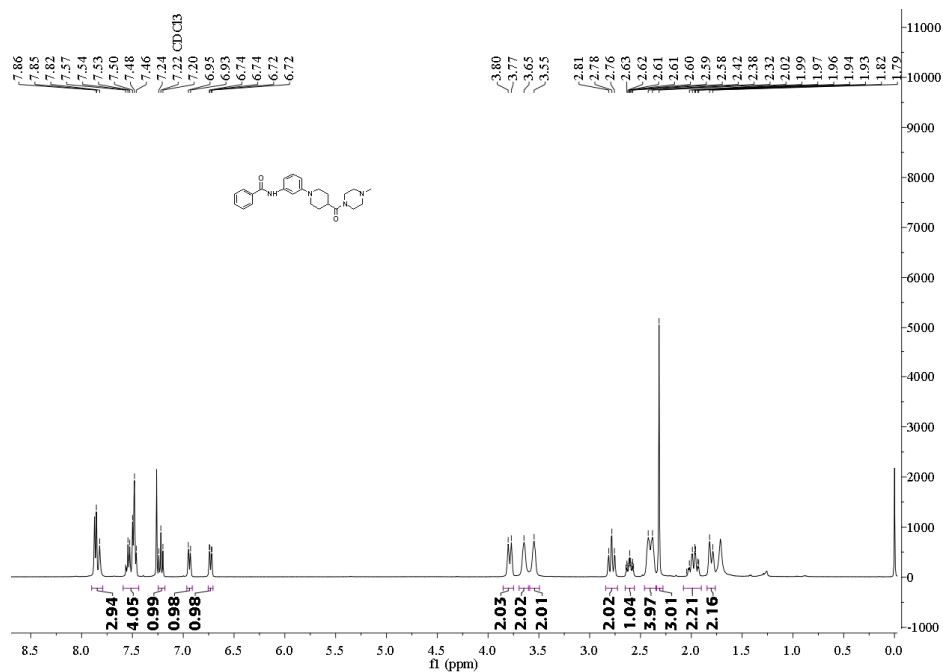

Fig. 5-2 <sup>1</sup>H-NMR spectrum of compound 5a

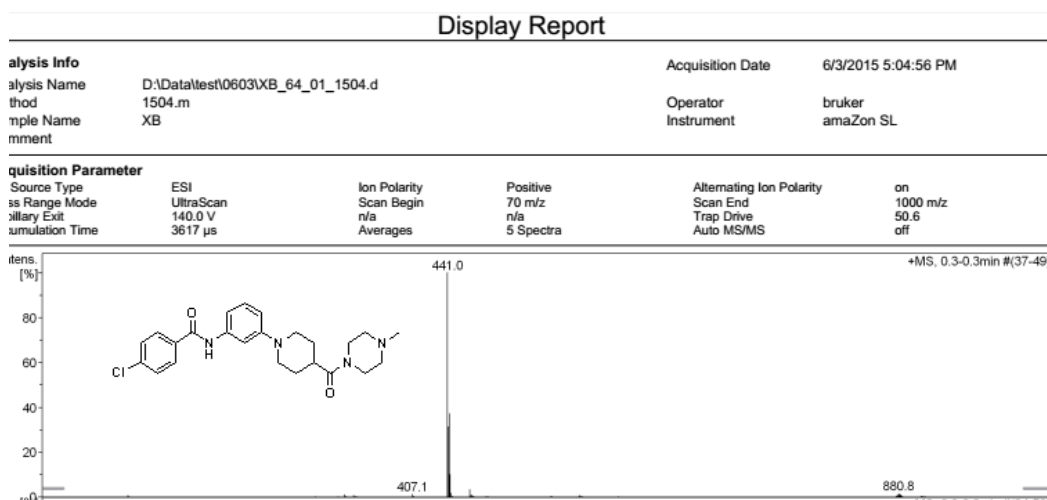

Fig.6-1 MS spectrum of compound 5b

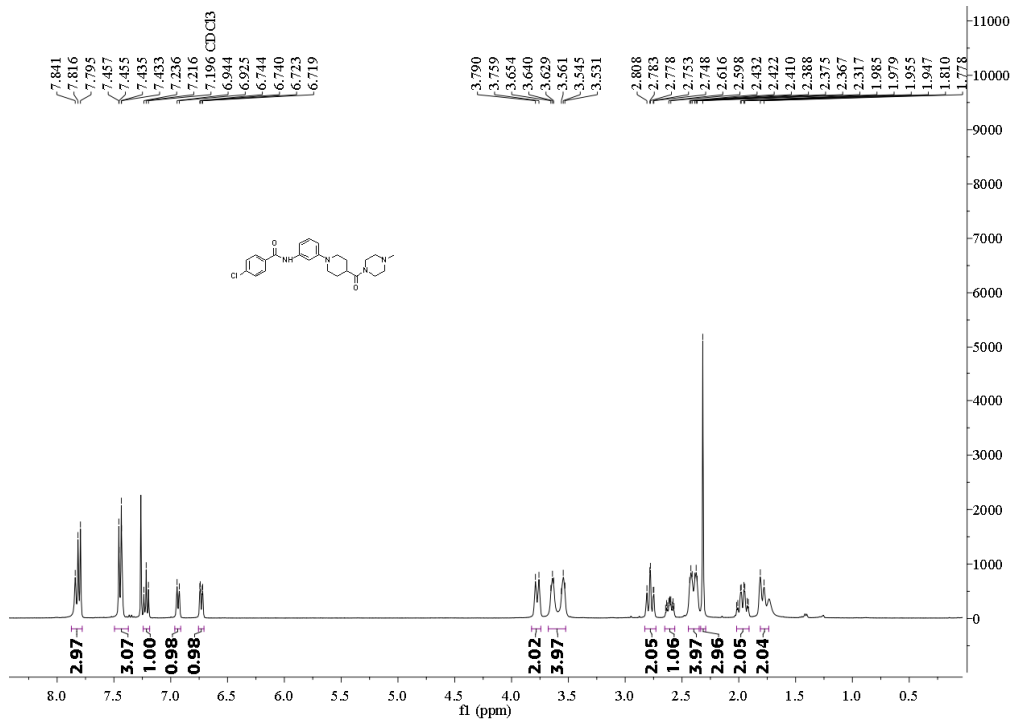

**Fig. 6-2** <sup>1</sup>H-NMR spectrum of compound **5b**

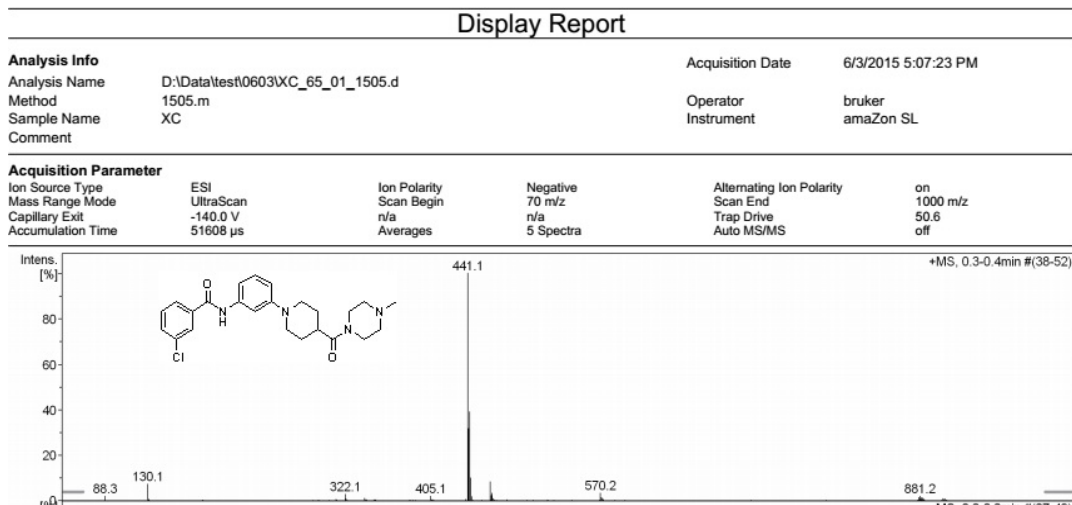

**Fig.7-1** MS spectrum of compound **5c**

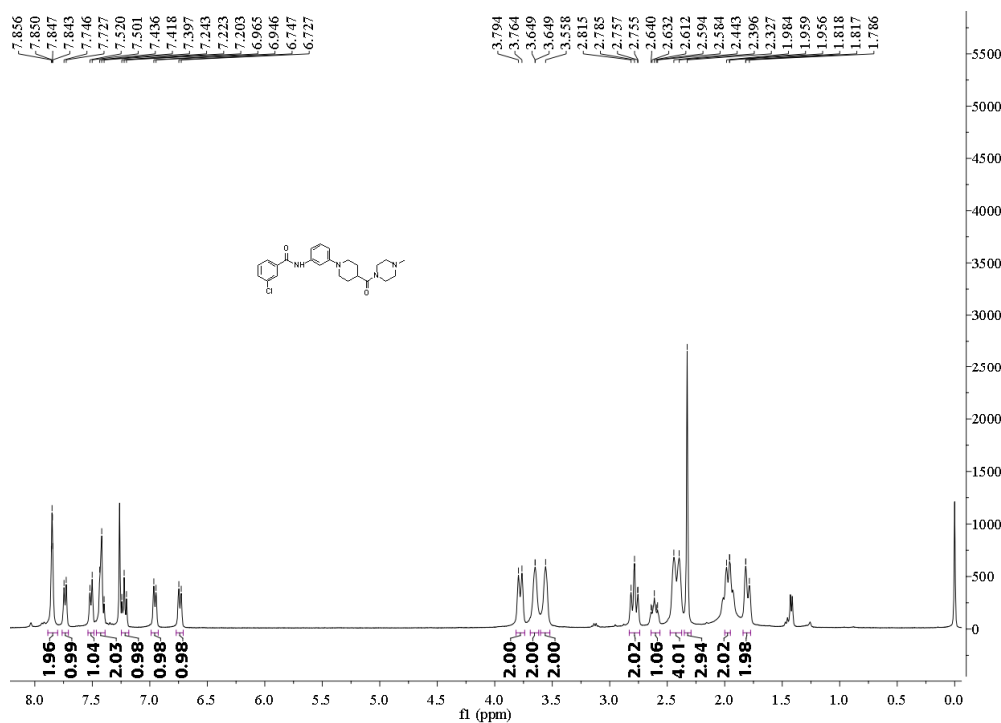

Fig. 7-2  $^1\text{H}$ -NMR spectrum of compound 5c

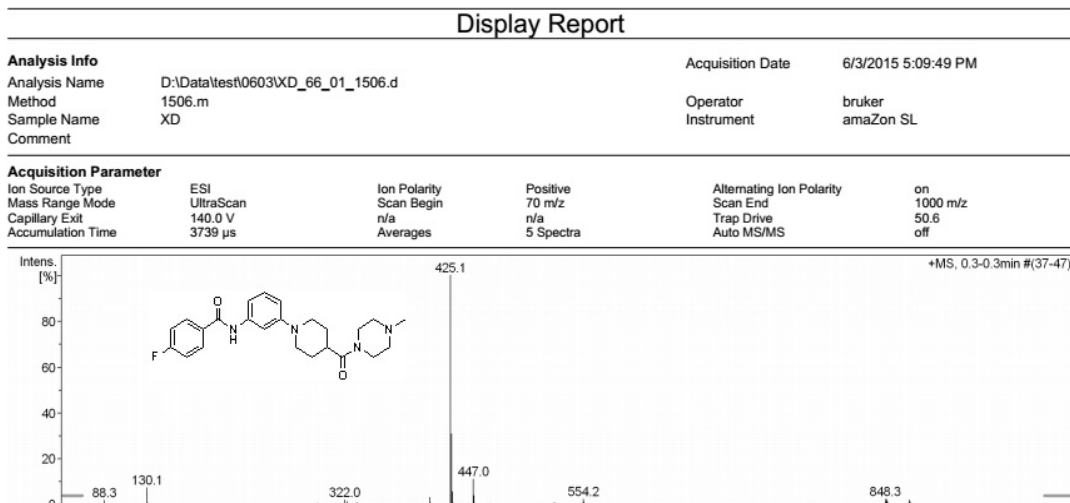

Fig.8-1 MS spectrum of compound 5d



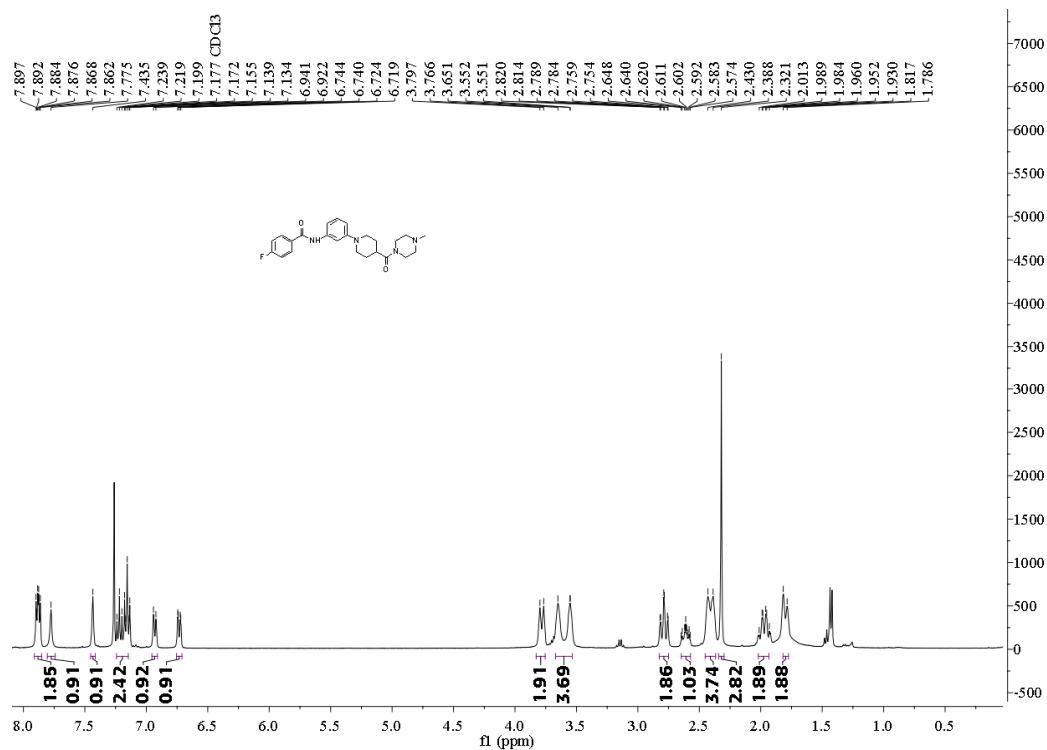

Fig.8-2  $^1\text{H}$ -NMR spectrum of compound 5d

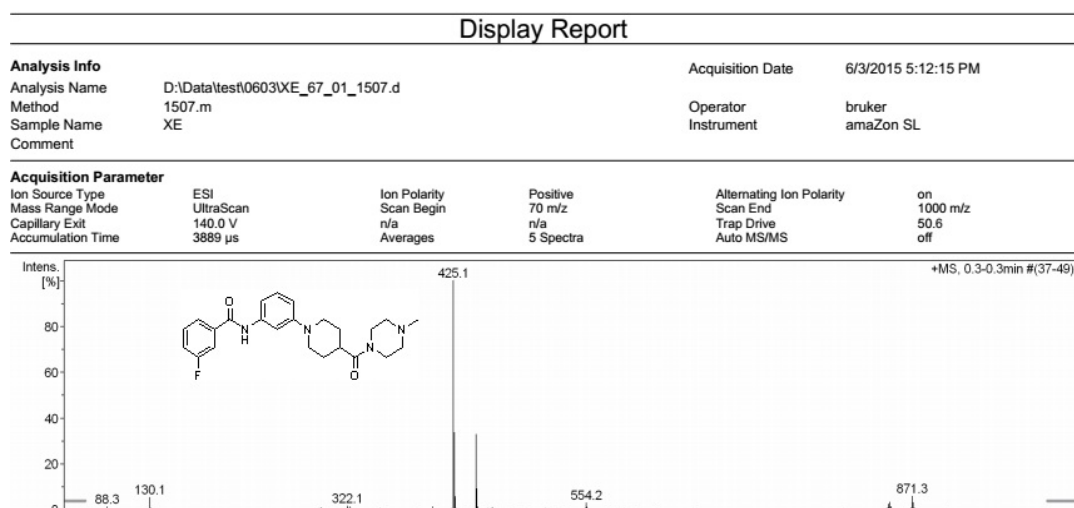

Fig.9-1 MS spectrum of compound 5e

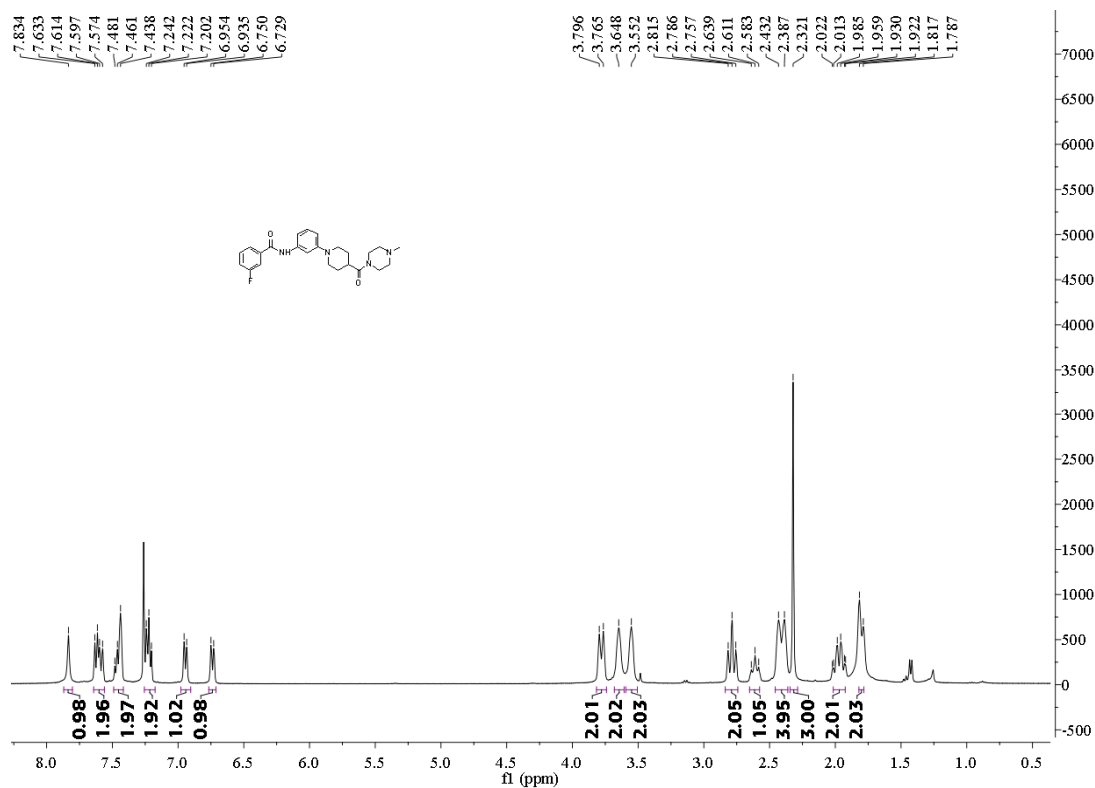

Fig.9-2  $^1\text{H}$ -NMR spectrum of compound 5e

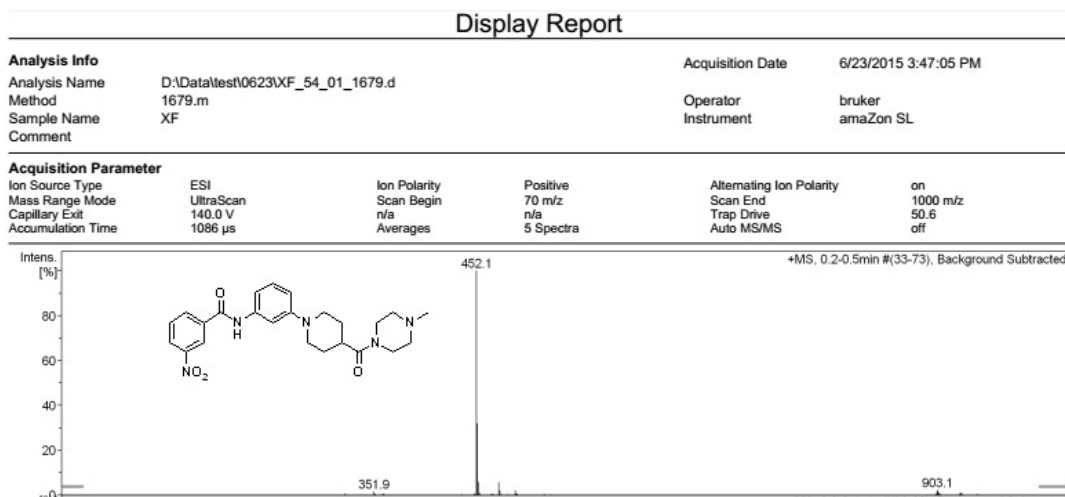

Fig.10-1 MS spectrum of compound 5f

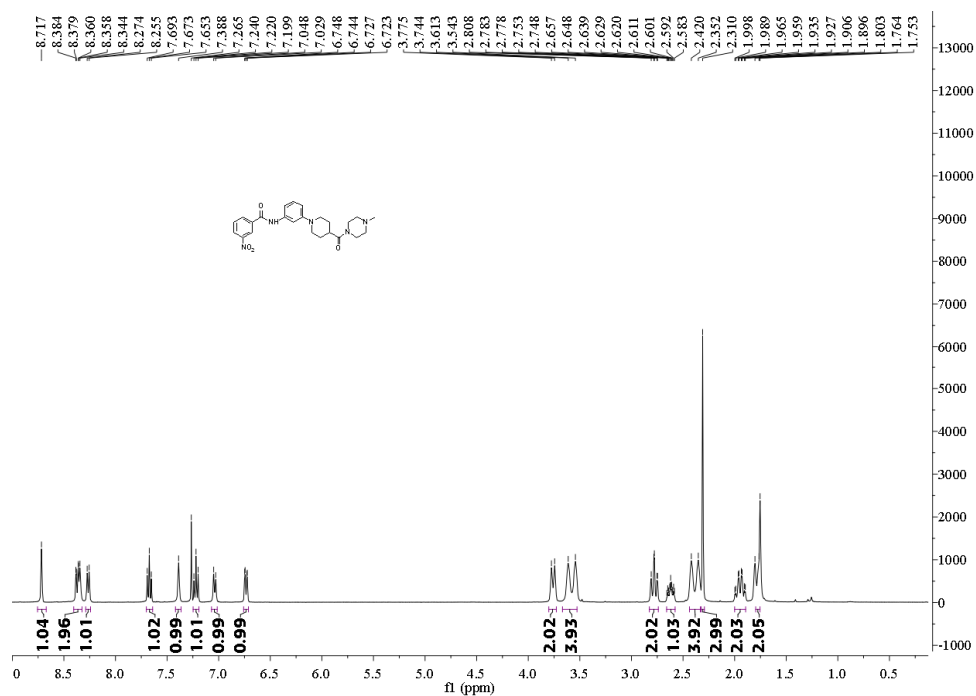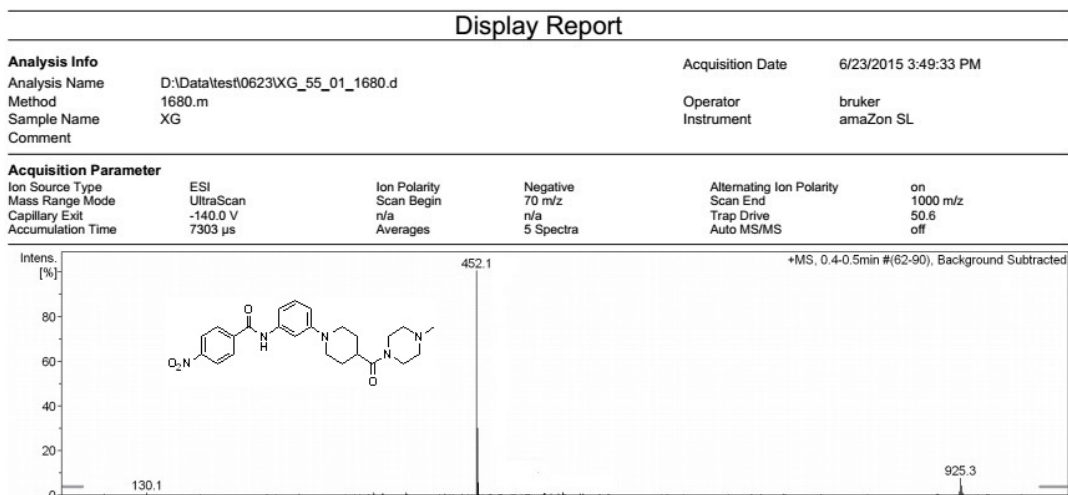

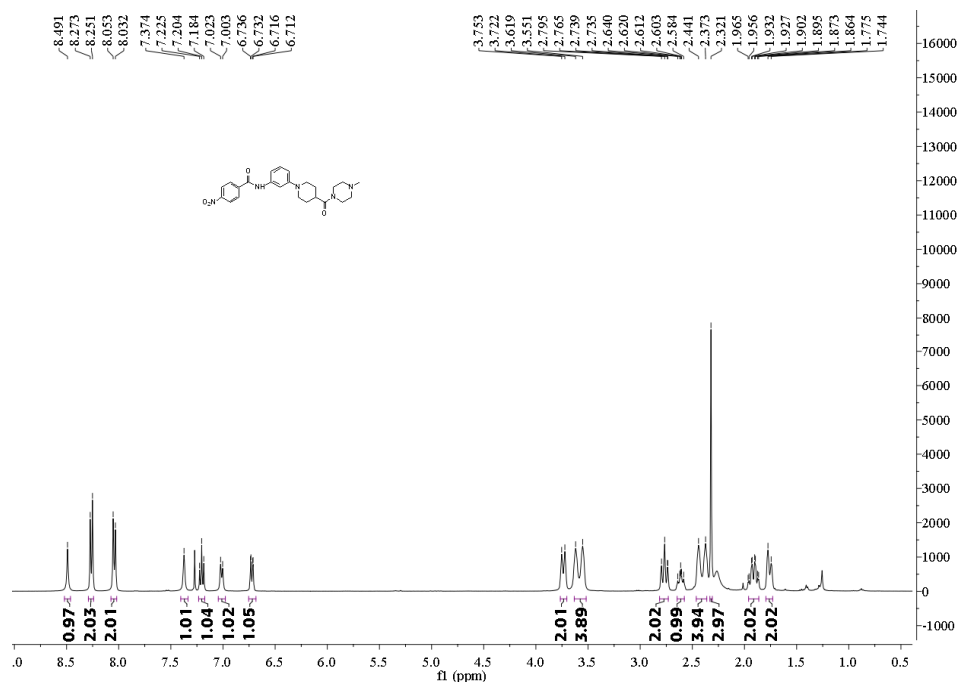

Fig.11-2 <sup>1</sup>H-NMR spectrum of compound 5g

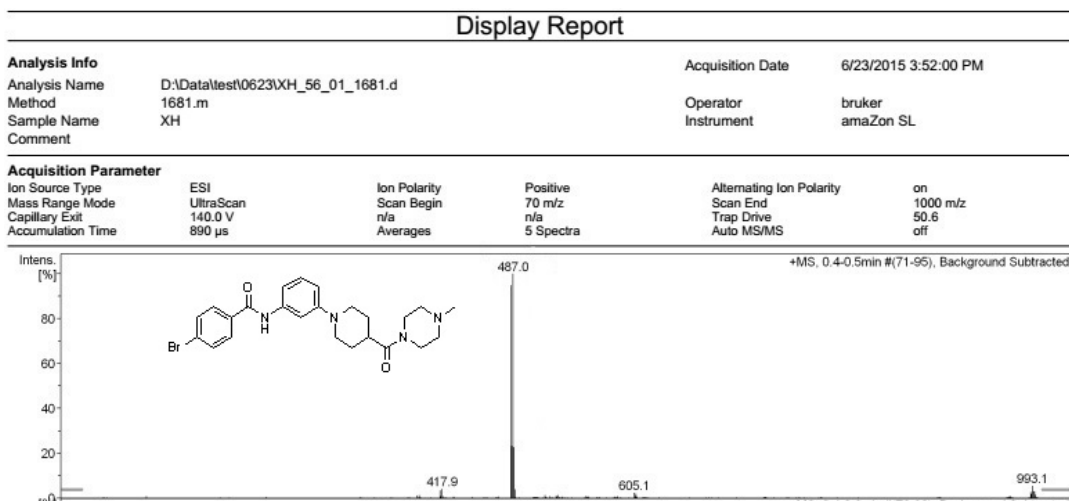

Fig.12-1 MS spectrum of compound 5h

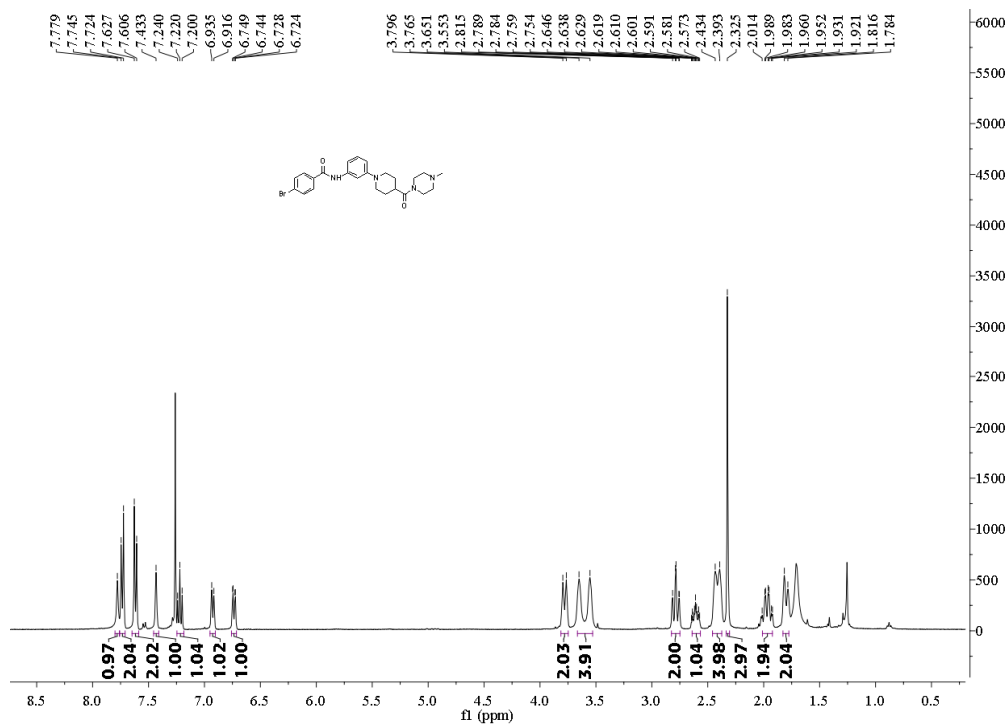

Fig.12-2 <sup>1</sup>H-NMR spectrum of compound 5h

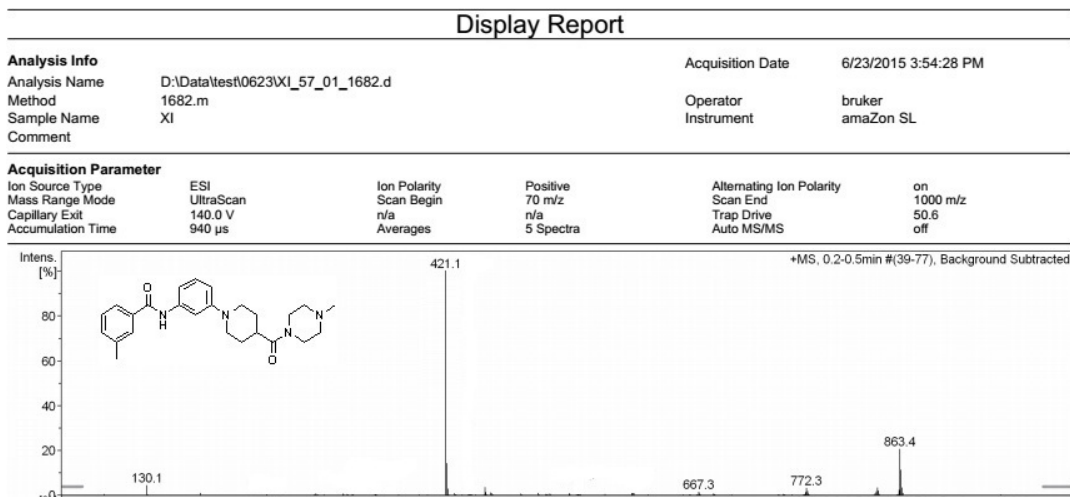

Fig.13-1 MS spectrum of compound 5i

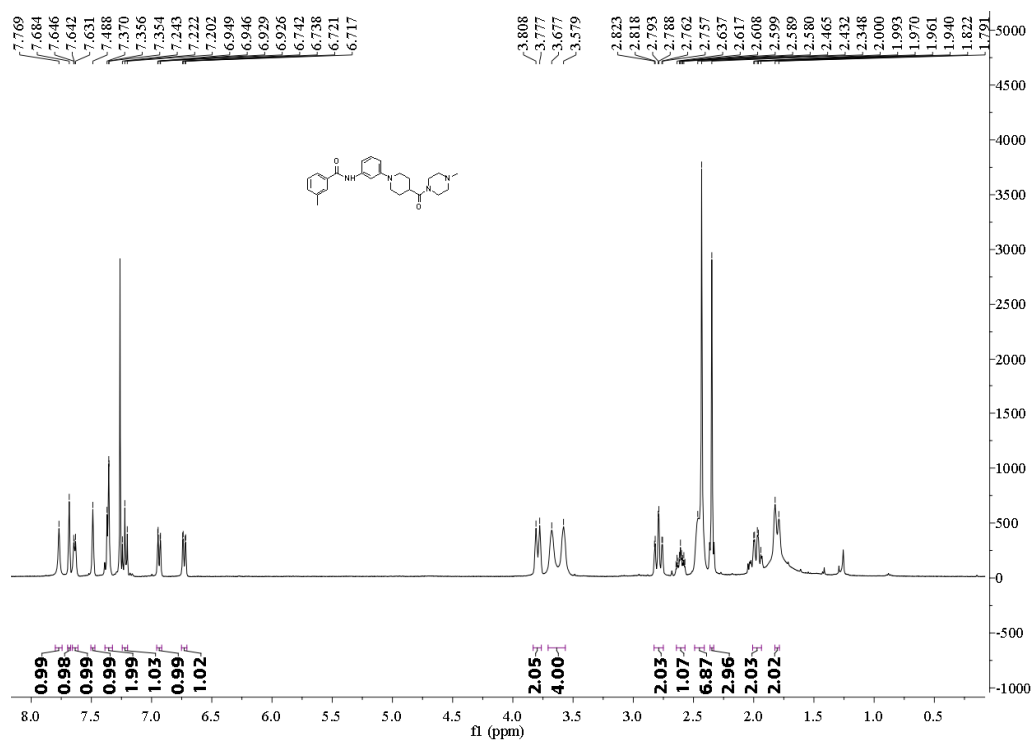

Fig.13-2  $^1\text{H}$ -NMR spectrum of compound 5i

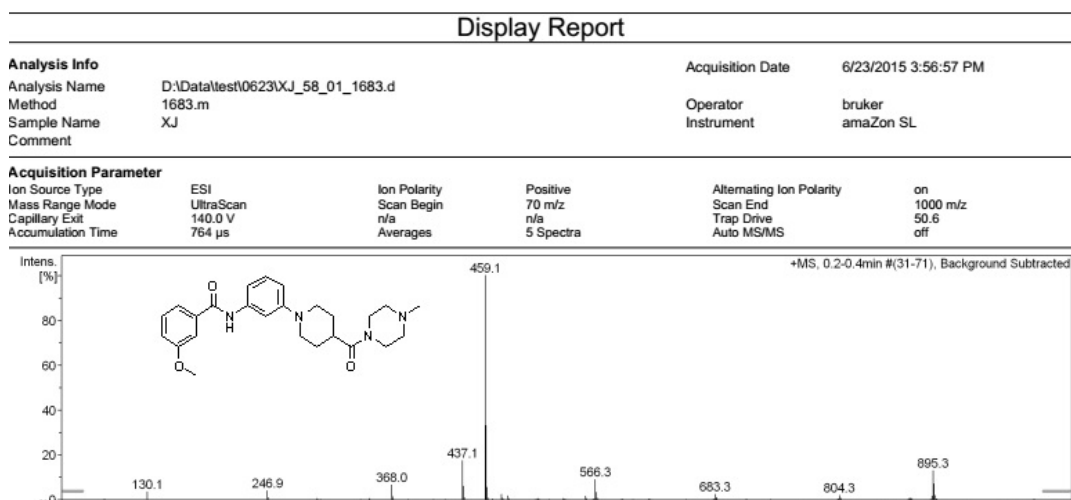

Fig.14-1 MS spectrum of compound 5j

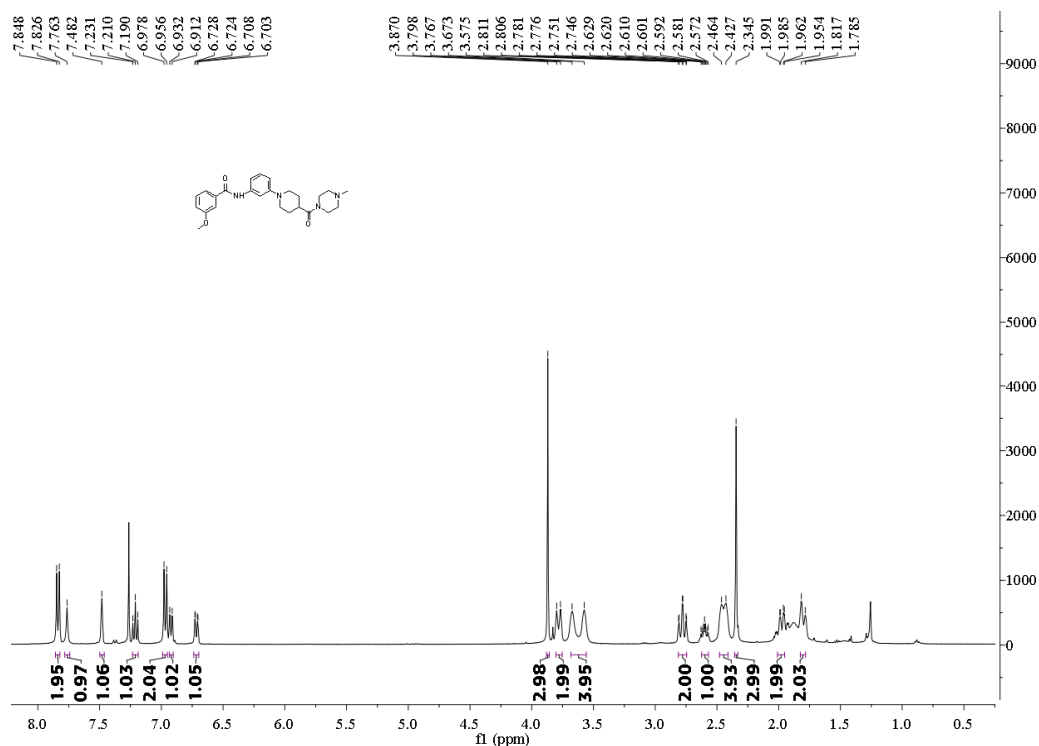

Fig.14-2 <sup>1</sup>H-NMR spectrum of compound 5j

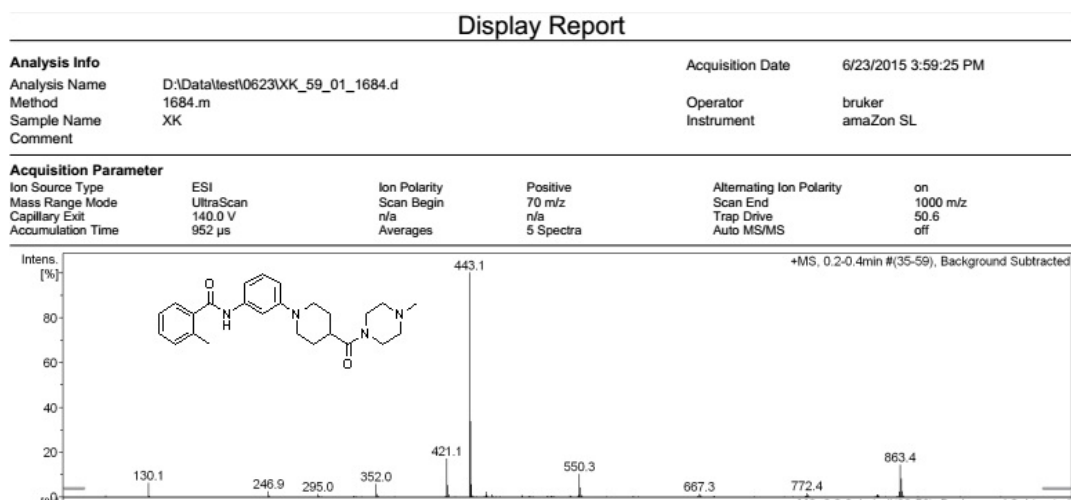

Fig.15-1 MS spectrum of compound 5k

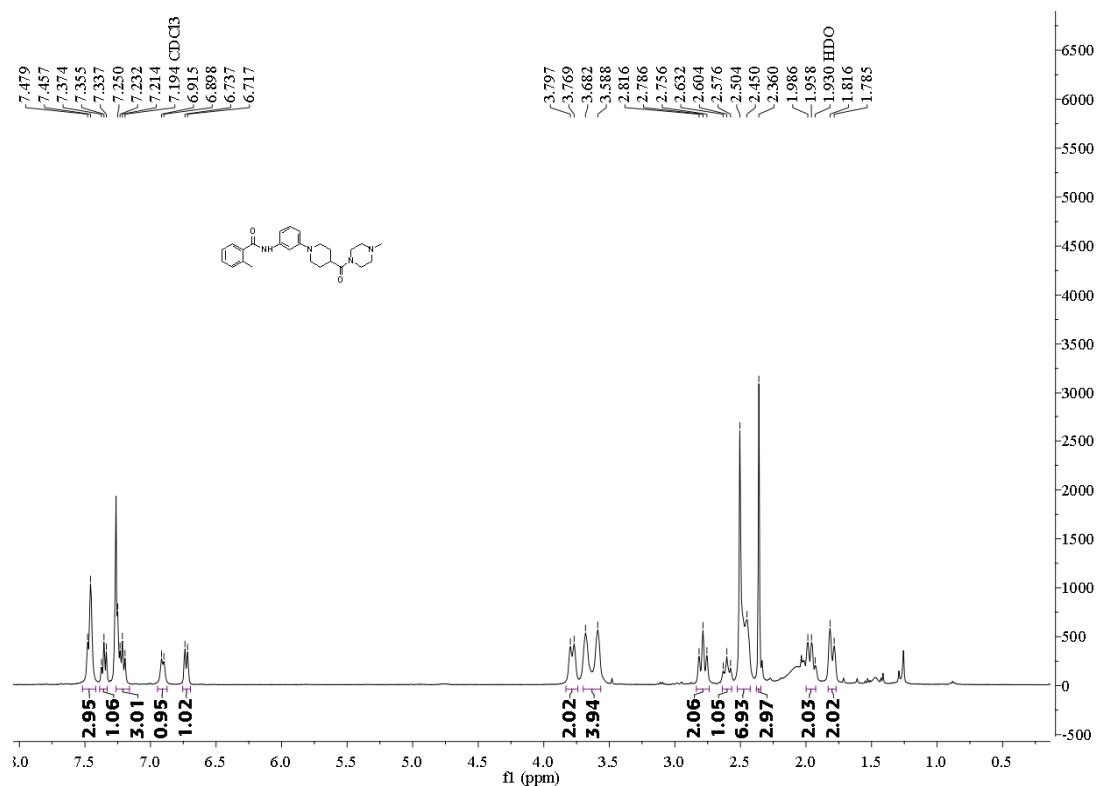

Fig.15-2  $^1\text{H}$ -NMR spectrum of compound 5k

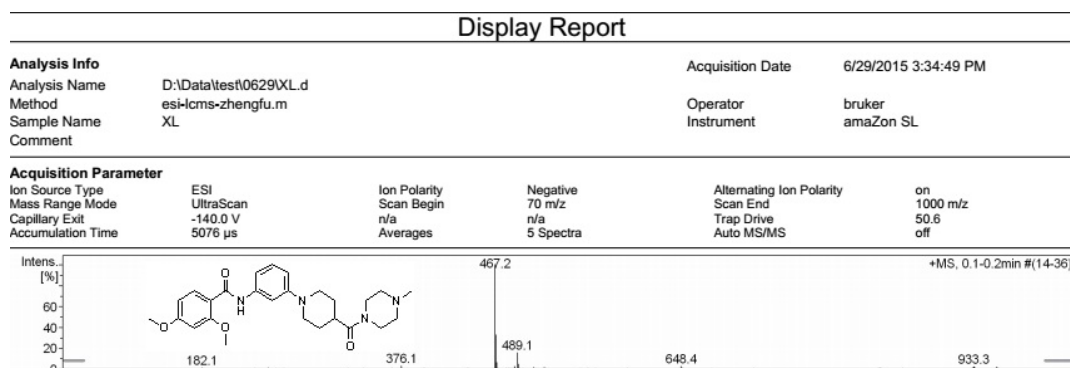

Fig.16-1 MS spectrum of compound 5l



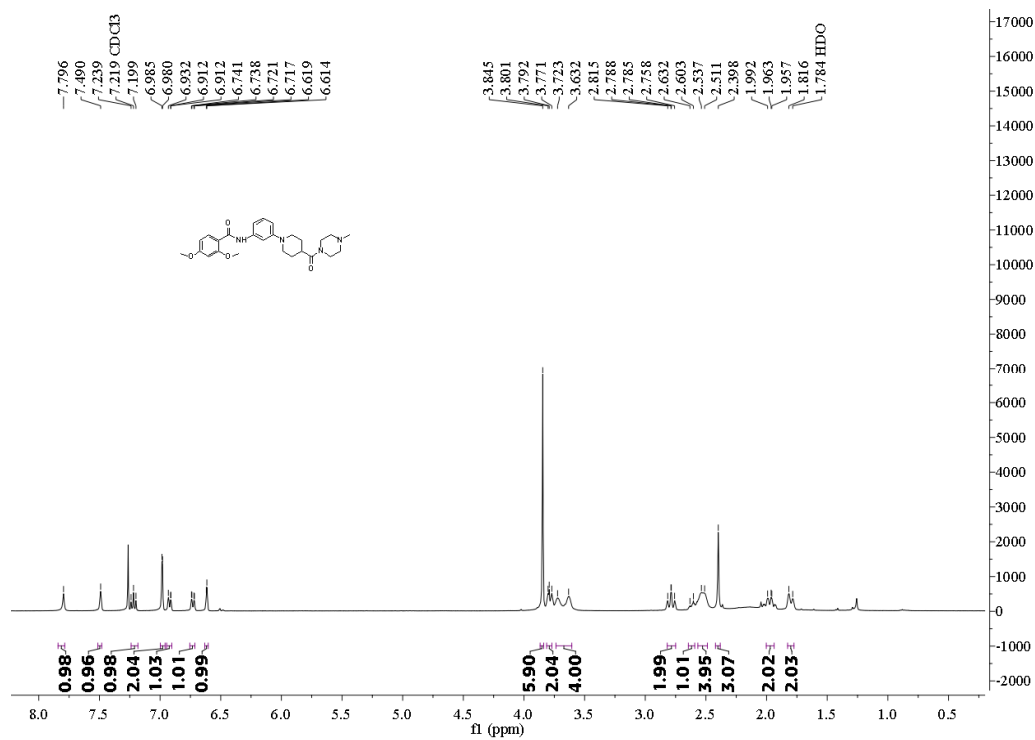

Fig.16-2  $^1\text{H}$ -NMR spectrum of compound 5l

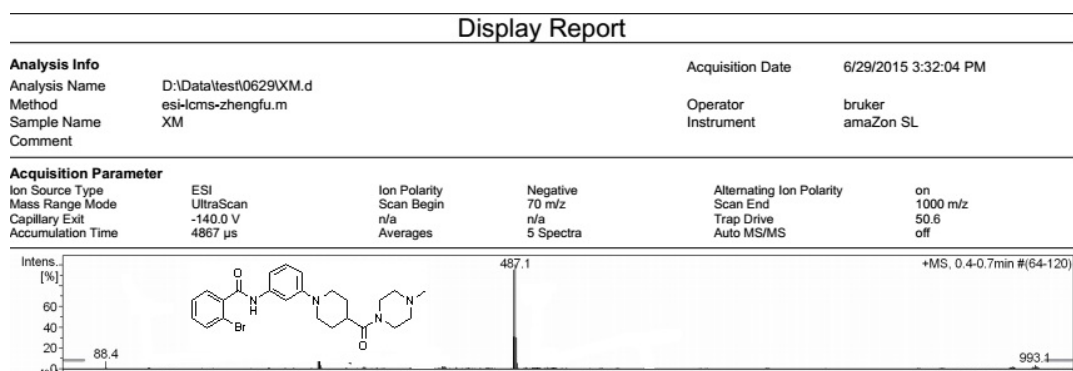

Fig.17-1 MS spectrum of compound 5m

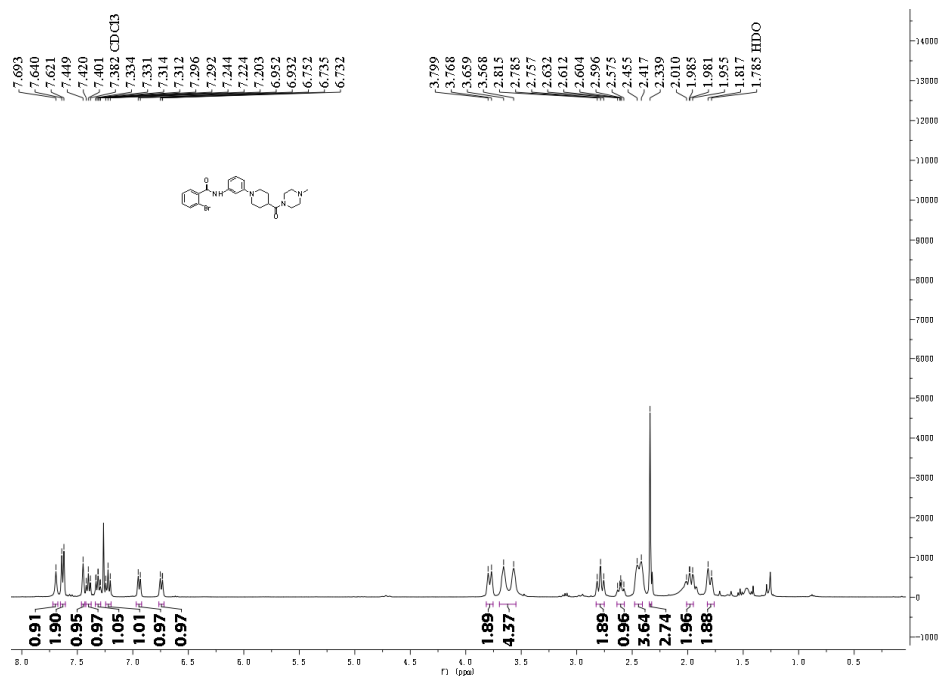

**Fig.17-2**  $^1\text{H}$ -NMR spectrum of compound **5m**

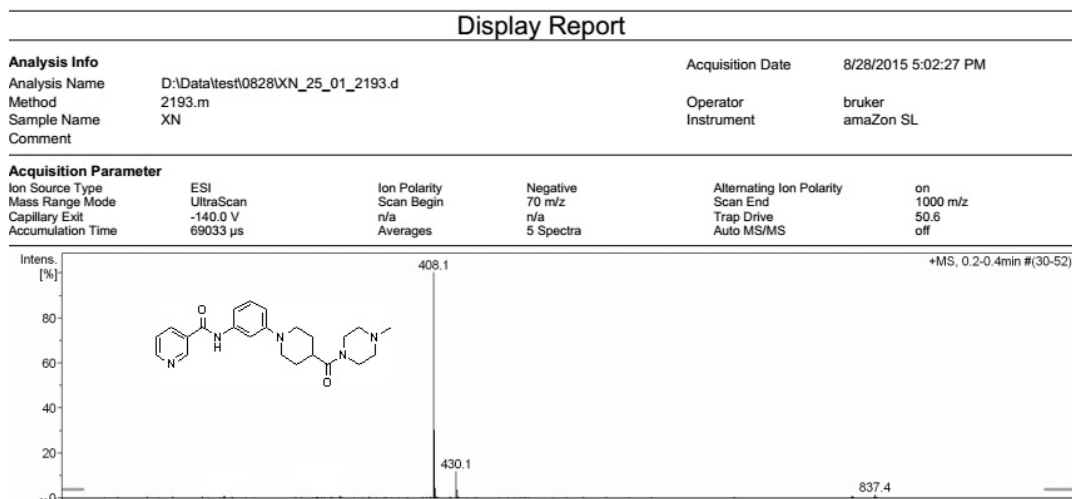

**Fig.18-1** MS spectrum of compound **5n**

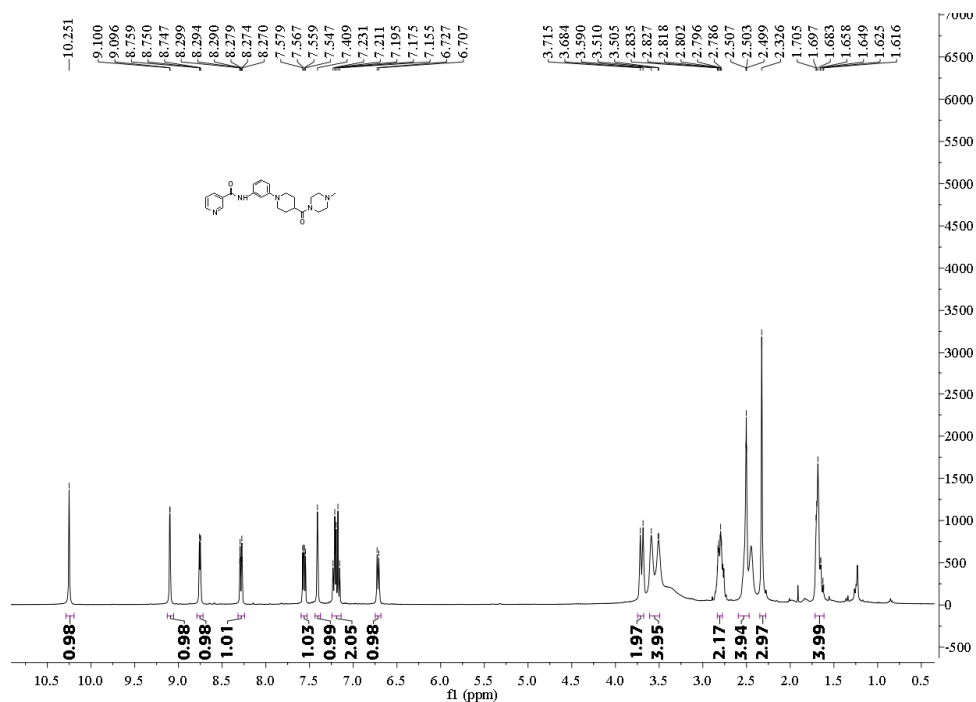

Fig.18-2  $^1\text{H}$ -NMR spectrum of compound 5n

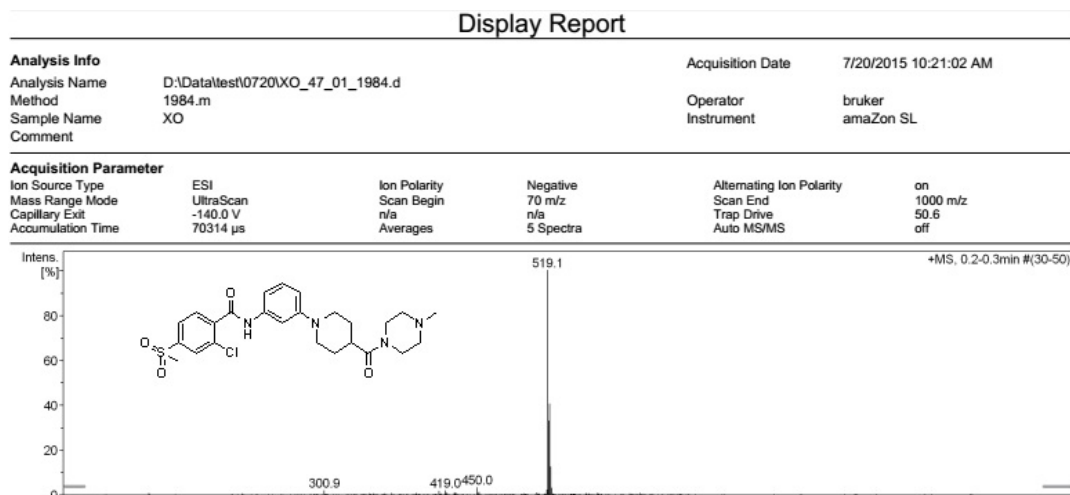

Fig.19-1 MS spectrum of compound 5o

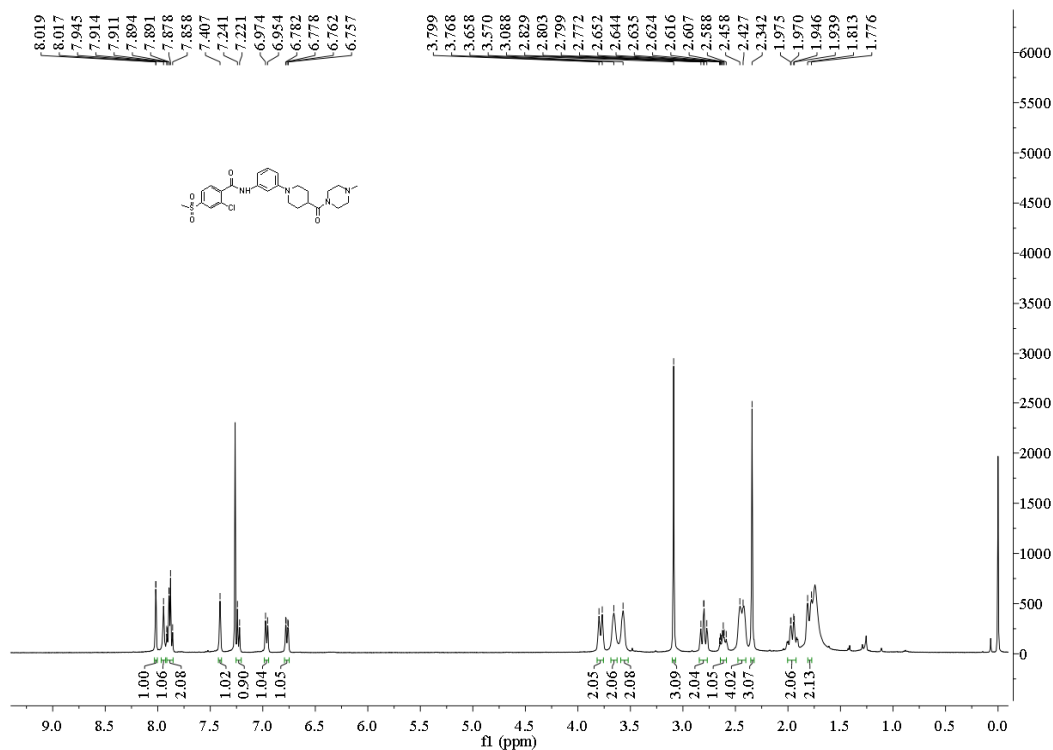

Fig.19-2  $^1\text{H}$ -NMR spectrum of compound 5o

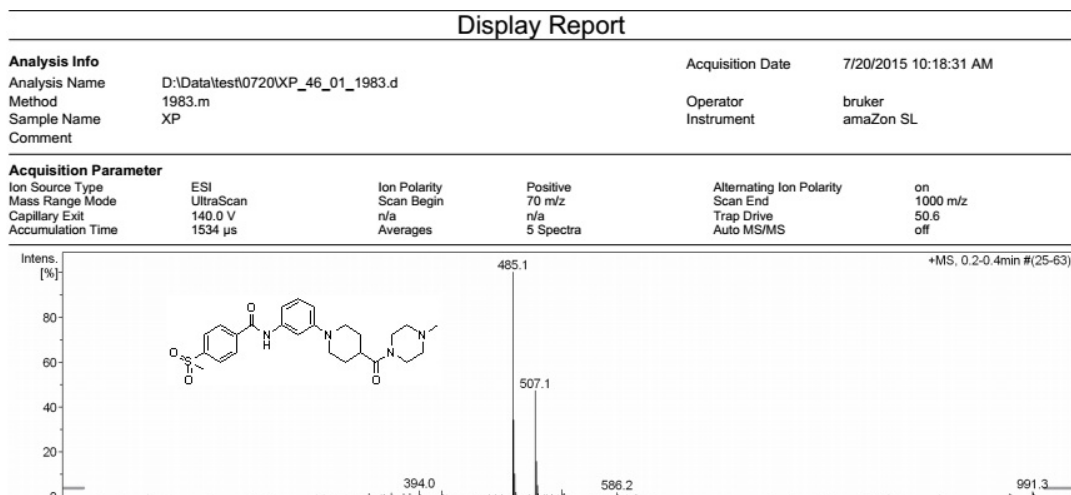

Fig.20-1 MS spectrum of compound 5p

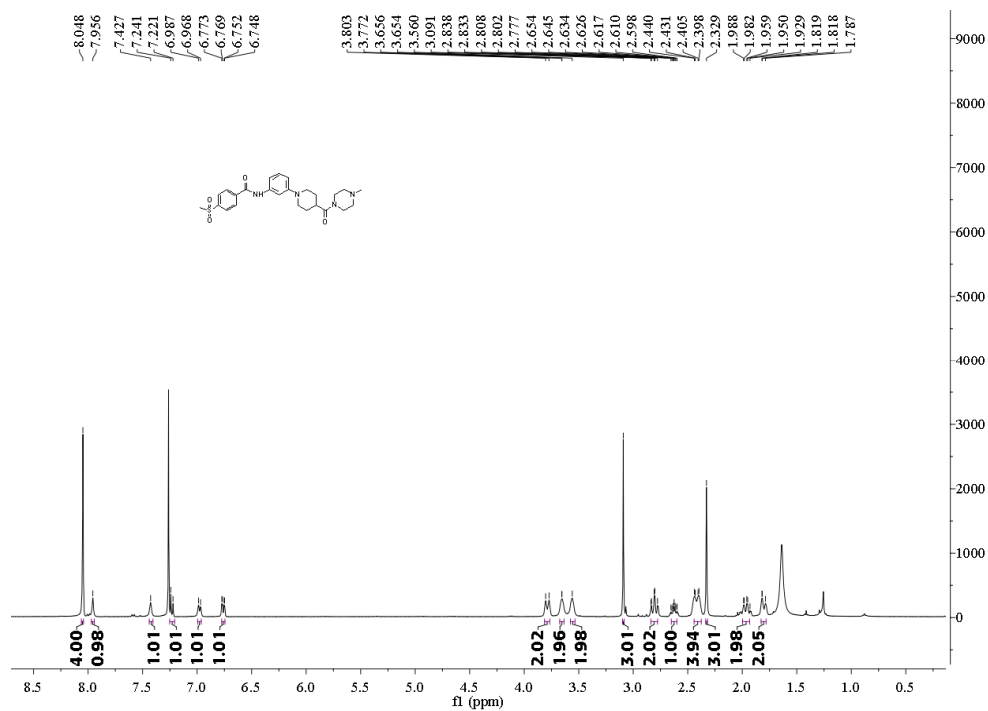

Fig.20-2  $^1\text{H}$ -NMR spectrum of compound 5p

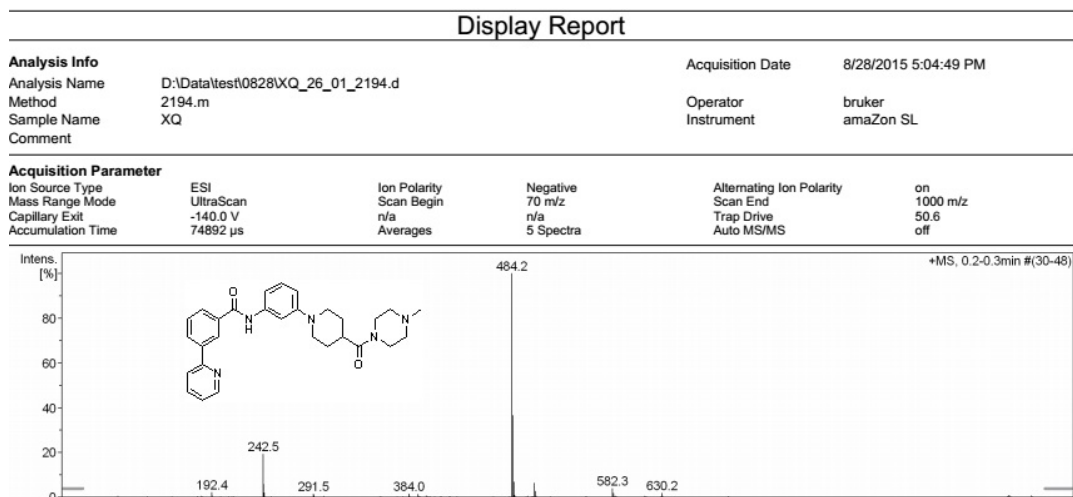

Fig.21-1 MS spectrum of compound 5q

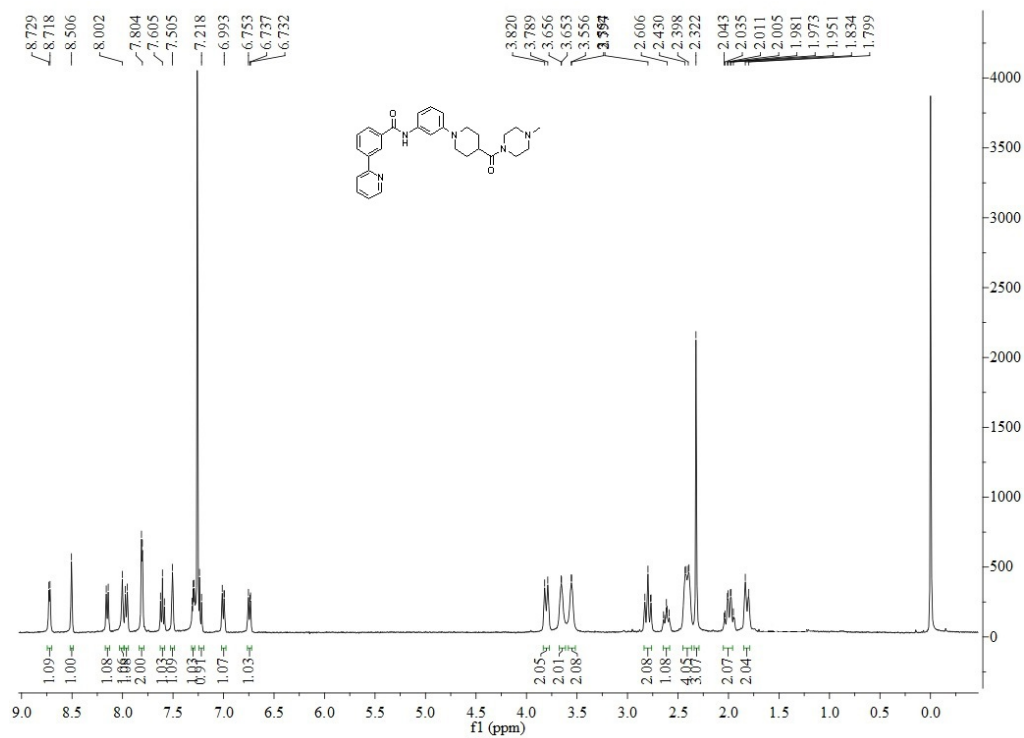

Fig.21-2 <sup>1</sup>H-NMR spectrum of compound 5q

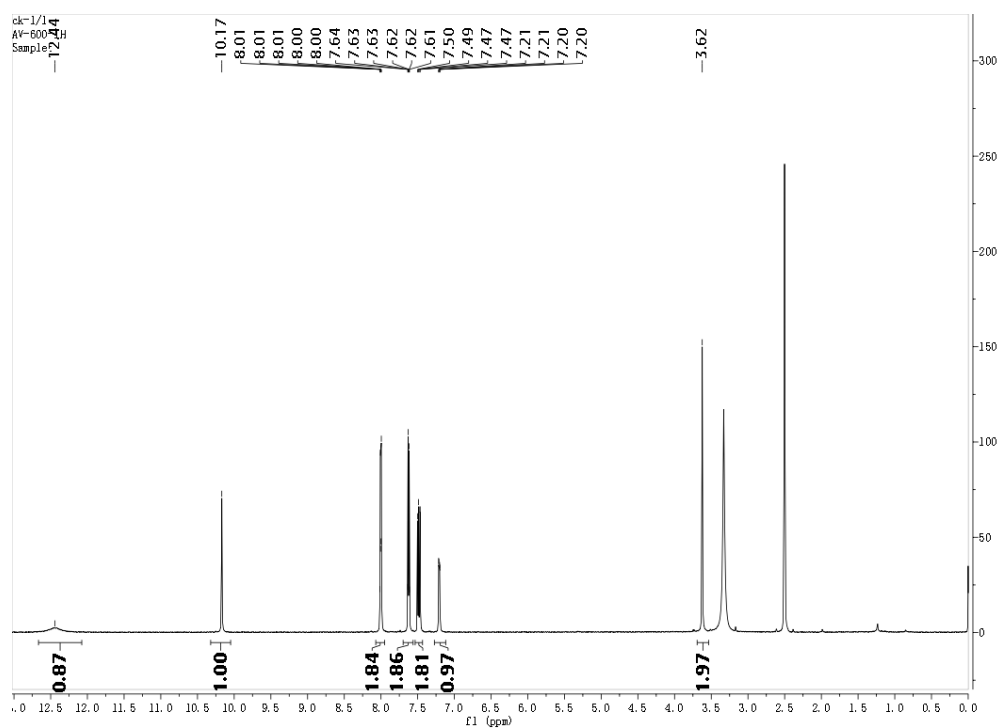

Fig.22 <sup>1</sup>H-NMR spectrum of compound 6

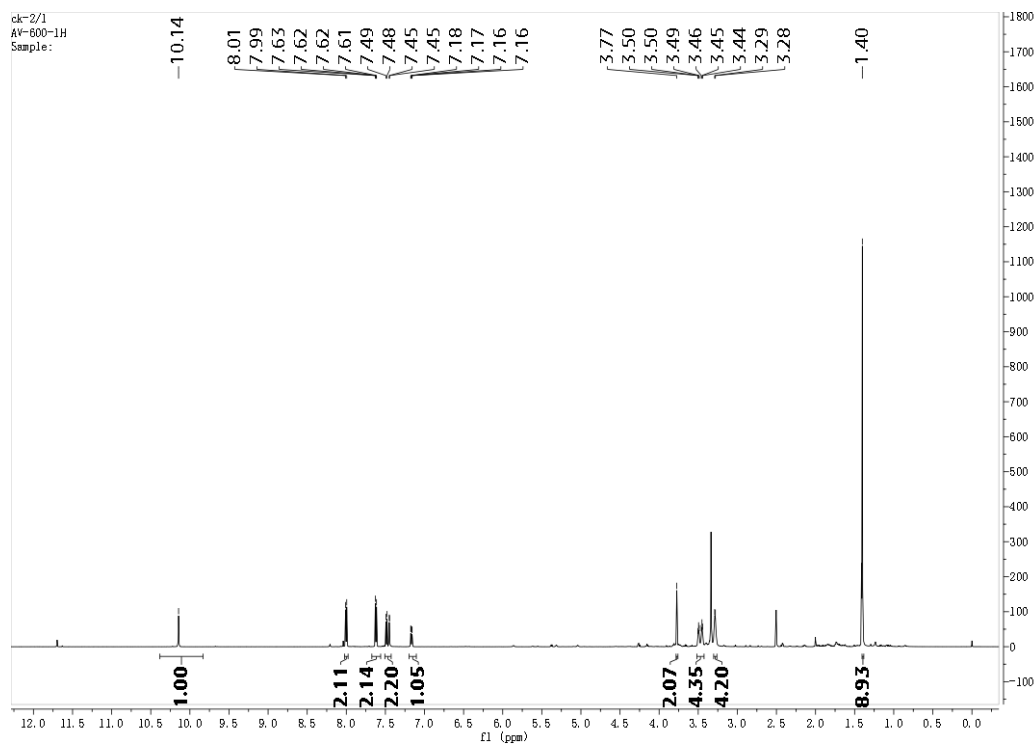

**Fig.23**  $^1\text{H}$ -NMR spectrum of compound 7

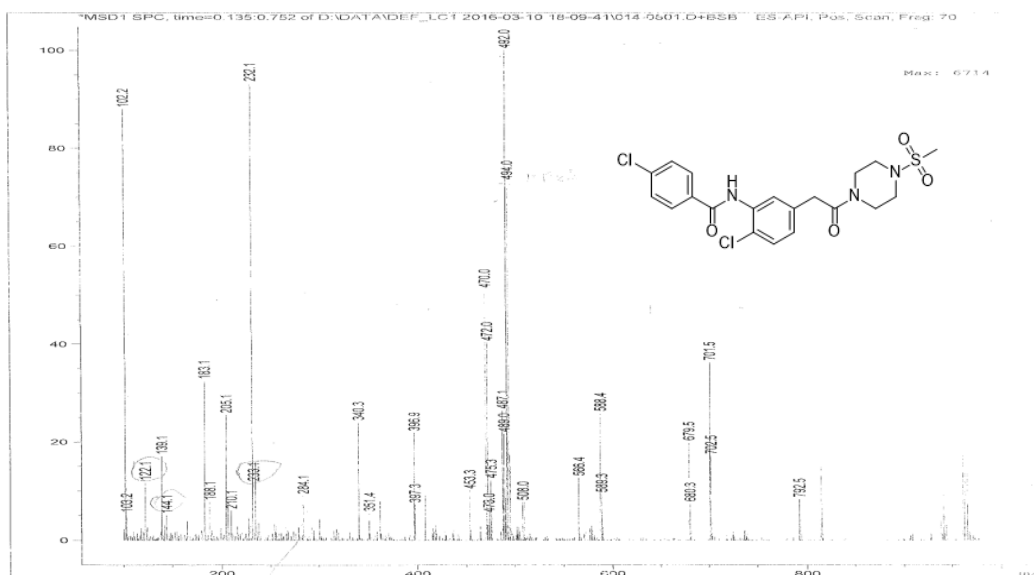

**Fig.24-1** MS spectrum of of compound 8a

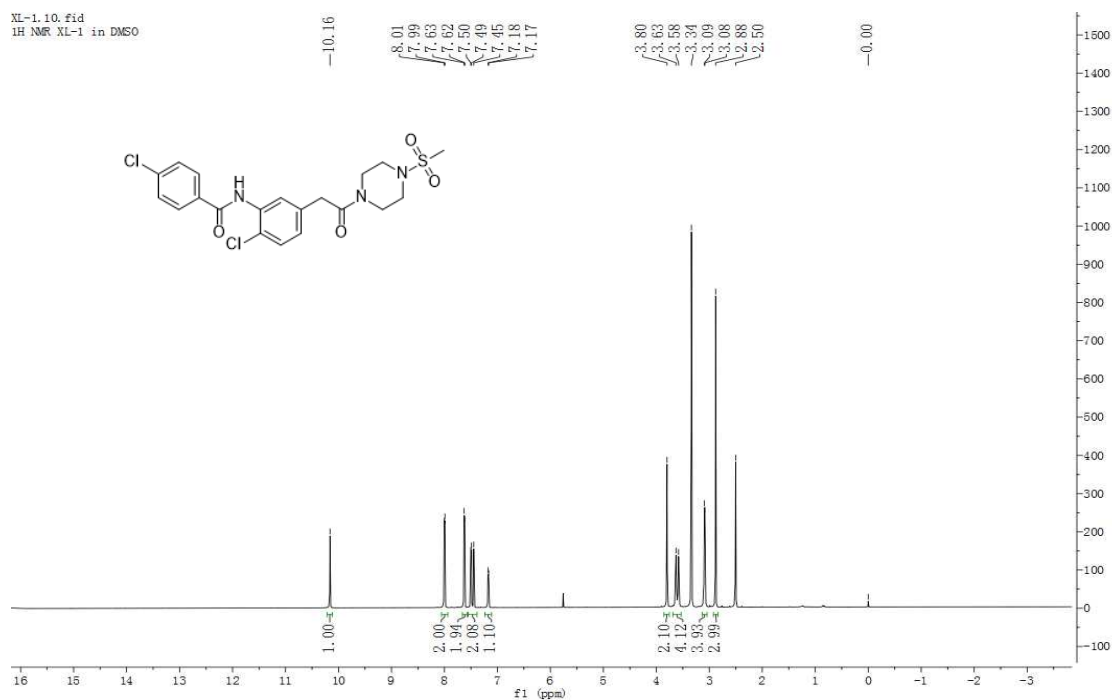

**Fig.24-2**  $^1\text{H}$ -NMR spectrum of compound **8a**

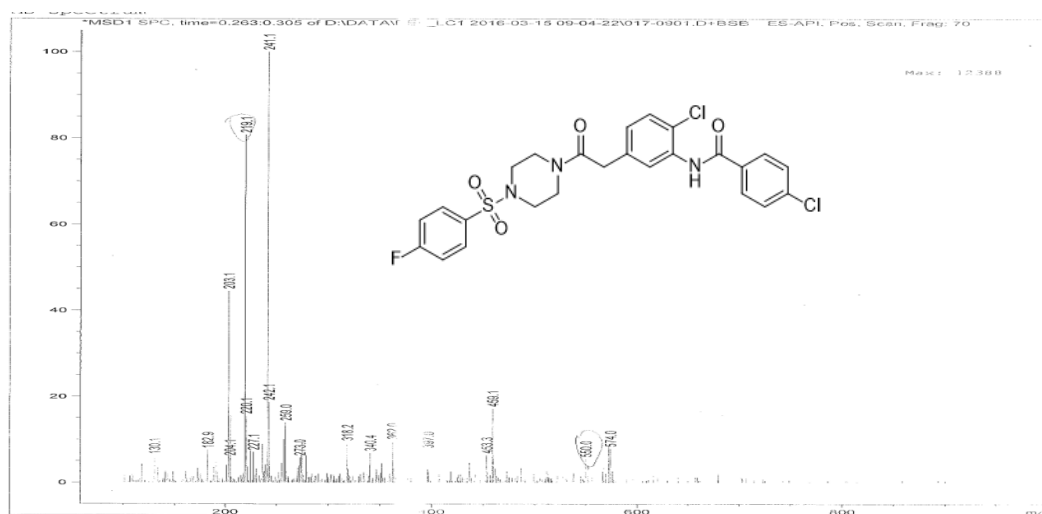

**Fig.25-1** MS spectrum of compound **8b**



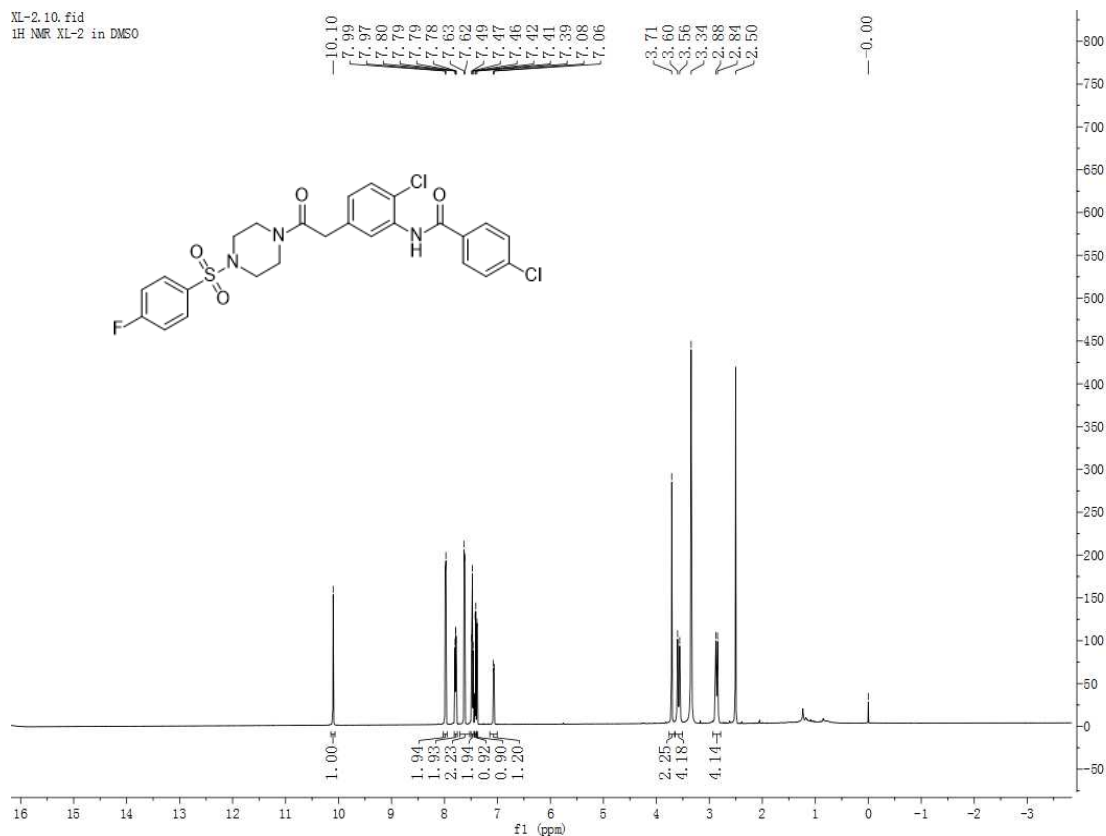

**Fig.25-2** <sup>1</sup>H-NMR spectrum of compound 8b

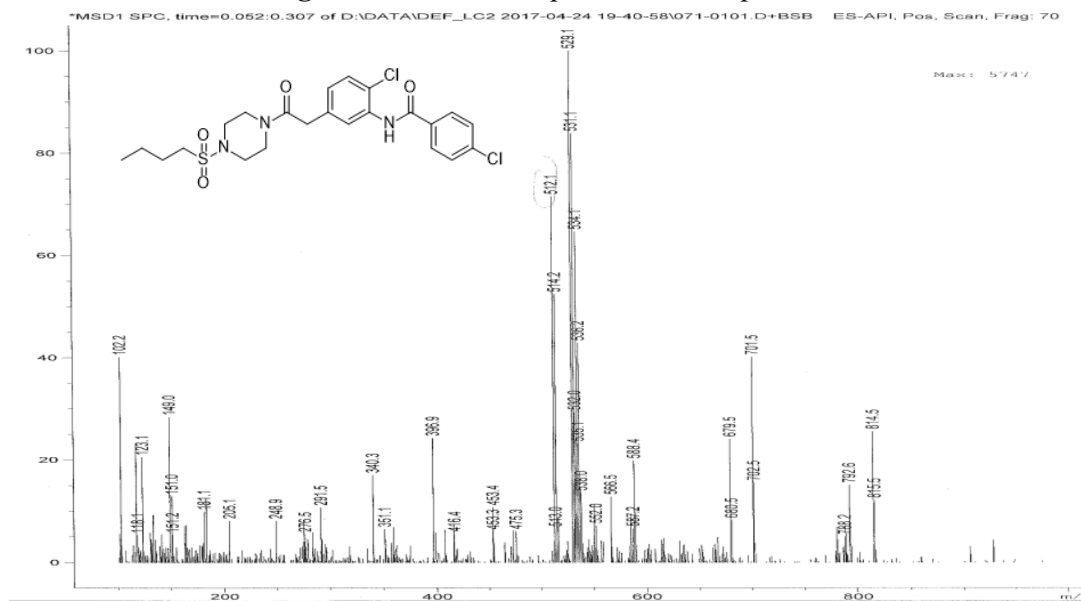

**Fig.26-1** MS spectrum of compound 8c

XL-3.10.fid  
<sup>1</sup>H NMR XL-3 in DMSO

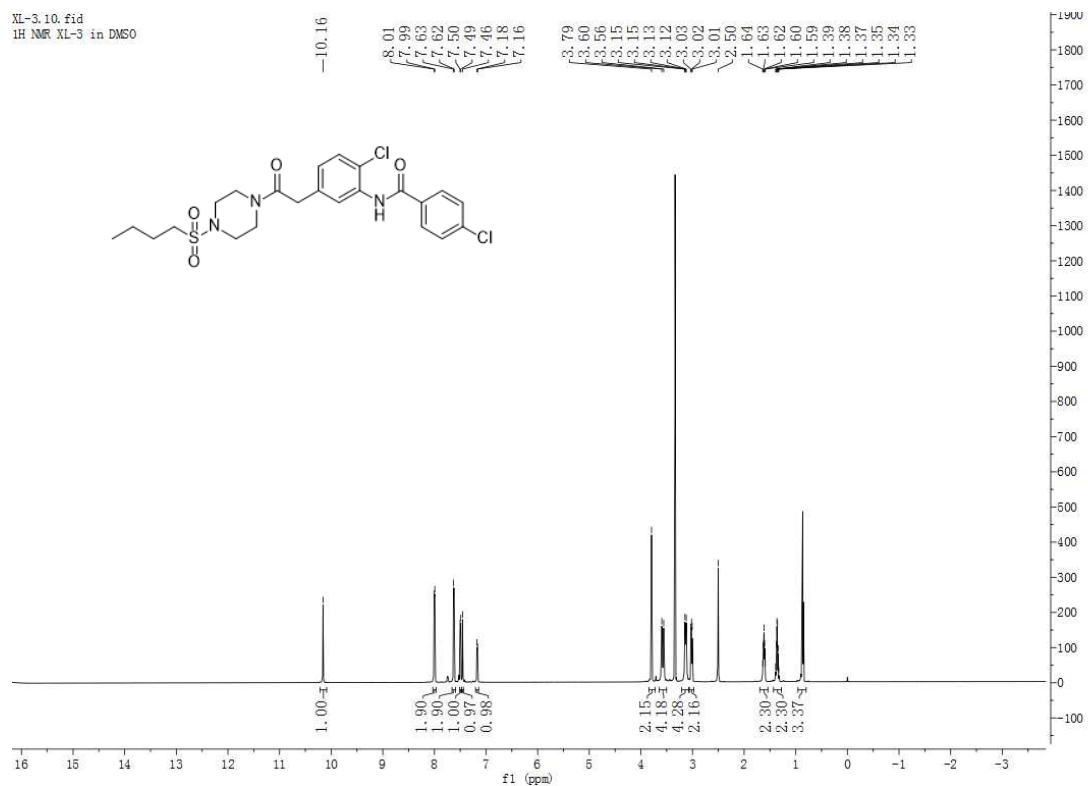

**Fig.26-2** <sup>1</sup>H-NMR spectrum of compound 8c
